# Supplementary material
Source: publisher site journal article supplement (https://www.dovepress.com/article/601572)
Supplement: Supplementary file 1 [file 601572%20Revised%20Supplementary%20Table%20S1.docx]

**Supplementary Table S1 Variance inflation factor (VIF) of each variable in the final model**

| Variables at the 2ed Month | VIF | Variables at the 6th Month | VIF |
| --- | --- | --- | --- |
| COPD | 1.205 | Sputum culture | 1.398 |
| PNI | 1.662 | PLR | 2.091 |
| Age | 1.337 | ALB | 1.236 |
| Pulmonary cavity | 1.055 | PNI | 1.626 |
| CD4+ | 1.501 | – | – |
| PLR | 1.743 | – | – |

**Note:** VIF < 5 indicates no severe multicollinearity.
